# Supplementary material for: Assessing genome-wide significance for the detection of differentially methylated regions
Source: publisher site journal article supplement (doi:10.1515/sagmb-2017-0050), 2018-09-19
Supplement: Supplementary file 1 [file S1_Threshold.pdf › S1_Threshold.pdf]

# Appendix 1

## Threshold selection

The threshold window size  $k$  is chosen such that the expected number of significant tests for each window size  $k$  is equal and the significance level of the total test is  $\alpha$ . Using extreme value theory Zhang deduces the following simple relationship between the significance level and the total intensity  $\lambda$ ,  $\alpha = 1 - e^{-\lambda}$ . Hence  $\lambda = -\log(1 - \alpha)$ . The number of non-overlapping windows of size  $k$  ( $\#window_k$ ) is equal to number of observation ( $nobs$ ) in the CpG-island divided by window size  $k$ . Therefore the threshold  $t_k$  of window size  $k$  is chosen such that the intensity  $\lambda_k = k \cdot \lambda_1$ . The total intensity  $\lambda = \sum_{k \in K} \lambda_k = \sum_{k \in K} k \cdot \lambda_1$ , here  $K$  is the set of window sizes to be examined. The expected number of significant windows of size  $k$  is given by

$$\mathbb{E}[\text{Significant Windows}] = \lambda_k \cdot window_k = k \cdot \lambda_1 \frac{nobs}{k} = \frac{\lambda}{\sum_{k \in K} \lambda} \cdot nobs = \frac{-\log(1 - \alpha)}{\sum_{k \in K} \lambda_k} \cdot nobs$$

and hence independent of the window size  $k$ . Hence we can derive number of significant windows allowed keeping the significance level  $\alpha$ . Using simulation we can find the optimal threshold such that

$$\mathbb{E}[\text{Significant Windows}] = \frac{-\log(1 - \alpha)}{\sum_{k \in K} \lambda_k} \cdot nobs$$

for the various window sizes.
